# Supplementary material for: Del1 Knockout Mice Developed More Severe Osteoarthritis Associated with Increased Susceptibility of Chondrocytes to Apoptosis
Source: PubMed Central journal article supplement (PMC4978450; doi:10.1371/journal.pone.0160684), 2016-08-09

Supplemental Figure 1

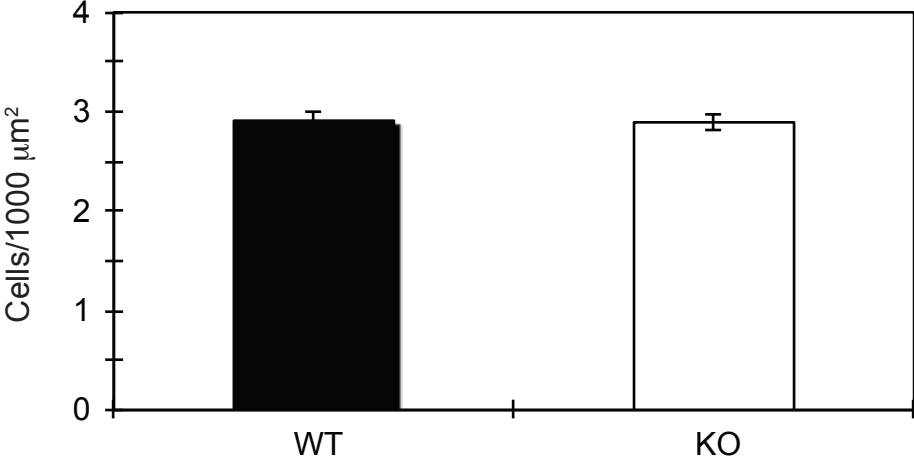

Supplement: pone.0160684.s001.pdf [file pone.0160684.s001.pdf]
